# Supplementary material
Source: PubMed Central journal article supplement (PMC3997636)
Supplement: supp_mcu017_mcu017supp_tables.pdf [file supp_mcu017_mcu017supp_tables.pdf]

## SUPPLEMENTARY DATA

**TABLE S1.** *Herbarium accession number, geographic details and regions amplified for all individuals used in microsatellite and/or sequence analysis.* 1 = successful amplification (and successful sequencing for the gene regions). 0 = unsuccessful amplification and/or sequencing. Untested marker/individual combinations are shaded grey. Marker/individual combinations in bold indicate sequences gained using 454 sequencing.

| Individual  | Species               | Accession no. | State | Lat     | Long    | Microsatellite |     |        |       |      | Nuclear |        |        |        | Chloroplast |       |          |          |           |           |            |   |
|-------------|-----------------------|---------------|-------|---------|---------|----------------|-----|--------|-------|------|---------|--------|--------|--------|-------------|-------|----------|----------|-----------|-----------|------------|---|
|             |                       |               |       |         |         | CA1F4          | AES | HO1HO6 | CA1D4 | M16B | waxy A  | waxy B | DMC1 A | DMC1 B | trx A       | trx B | CDO504 A | CDO504 B | trnH-psbA | rpoB-trnC | rpl32-trnL |   |
| Pan_ACT_97  | <i>Poa annua</i>      | CANB 312513   | ACT   | -35.283 | 149.117 |                |     |        |       |      | 1       | 1      | 1      | 1      | 0           | 0     | 1        | 1        | 1         | 1         | 1          | 1 |
| Pan_NSW_92  | <i>Poa annua</i>      | CANB 407148   | NSW   | -36.250 | 150.233 |                |     |        |       |      | 1       | 1      | 1      | 1      | 0           | 0     | 0        | 0        | 1         | 1         | 1          | 1 |
| Pan_NSW_93  | <i>Poa annua</i>      | CANB 343723   | NSW   | -36.450 | 148.283 |                |     |        |       |      | 1       | 1      | 1      | 1      | 0           | 0     | 1        | 1        | 1         | 1         | 1          | 1 |
| Pcl_ACT_102 | <i>Poa clivicola</i>  | CANB 438760   | ACT   | -35.567 | 148.783 |                |     |        |       |      | 1       | 1      | 1      | 1      | 1           | 1     | 1        | 1        | 1         | 1         | 1          | 1 |
| Pcl_ACT_103 | <i>Poa clivicola</i>  | CANB 228786   | ACT   | -35.533 | 148.917 |                |     |        |       |      | 1       | 1      | 1      | 1      | 1           | 1     | 1        | 1        | 1         | 1         | 1          | 1 |
| Pcl_ACT_104 | <i>Poa clivicola</i>  | CANB 8906309  | ACT   | -35.689 | 148.842 |                |     |        |       |      | 1       | 1      | 1      | 1      | 1           | 0     | 1        | 1        | 1         | 1         | 1          | 1 |
| Pcl_ACT_105 | <i>Poa clivicola</i>  | CANB 8702739  | ACT   | -35.542 | 148.950 |                |     |        |       |      | 1       | 1      | 1      | 1      | 1           | 0     | 1        | 1        | 1         | 1         | 1          | 1 |
| Pcl_ACT_44  | <i>Poa clivicola</i>  | MEL 650412A   | ACT   | -35.533 | 148.900 | 1              | 1   | 1      | 1     | 1    | 0       | 0      | 1      | 1      |             |       |          |          |           |           | 0          | 1 |
| Pcl_ACT_45  | <i>Poa clivicola</i>  | MEL 1617342A  | ACT   | -35.575 | 148.783 | 1              | 1   | 1      | 1     | 1    | 1       | 0      | 1      | 1      |             |       |          |          |           |           | 1          | 1 |
| Pcl_NSW_100 | <i>Poa clivicola</i>  | CANB 329728   | NSW   | -36.500 | 148.333 |                |     |        |       |      | 1       | 1      | 1      | 1      | 1           | 1     | 1        | 0        | 1         | 1         | 1          | 1 |
| Pcl_NSW_101 | <i>Poa clivicola</i>  | CANB 228805   | NSW   | -35.550 | 148.667 |                |     |        |       |      | 1       | 1      | 1      | 1      | 1           | 0     | 1        | 1        | 1         | 1         | 1          | 1 |
| Pcl_NSW_99  | <i>Poa clivicola</i>  | CANB 647153   | NSW   | -35.783 | 149.350 |                |     |        |       |      | 1       | 1      | 1      | 1      | 1           | 1     | 1        | 1        | 1         | 1         | 1          | 1 |
| Pcl_Vic_46  | <i>Poa clivicola</i>  | MEL 2011778A  | Vic   | -37.017 | 147.233 | 1              | 1   | 1      | 1     | 1    | 1       | 1      | 1      | 1      |             |       |          |          |           |           | 1          | 1 |
| Pco_NSW_1   | <i>Poa costiniana</i> | MEL 302832A   | NSW   | -36.450 | 148.250 | 1              | 1   | 1      | 1     | 1    | 0       | 1      | 0      | 0      |             |       |          |          |           |           | 0          | 1 |
| Pco_NSW_107 | <i>Poa costiniana</i> | CANB 619578   | NSW   | -34.575 | 149.736 |                |     |        |       |      | 1       | 1      | 1      | 1      | 1           | 0     | 1        | 1        | 1         | 1         | 1          | 1 |
| Pco_NSW_108 | <i>Poa costiniana</i> | CANB 619540   | NSW   | -34.374 | 149.545 |                |     |        |       |      | 1       | 1      | 1      | 1      | 1           | 0     | 1        | 1        | 1         | 0         | 1          | 1 |
| Pco_NSW_110 | <i>Poa costiniana</i> | CANB 505348   | NSW   | -36.450 | 148.267 |                |     |        |       |      | 1       | 1      | 1      | 1      | 1           | 1     | 1        | 1        | 1         | 1         | 1          | 1 |
| Pco_NSW_117 | <i>Poa costiniana</i> | CANB 9707880  | NSW   | -36.456 | 148.278 |                |     |        |       |      | 1       | 1      | 1      | 1      | 1           | 0     | 1        | 1        | 1         | 1         | 1          | 1 |



|             |                                                                                                                                                              |              |     |         |         |   |   |   |   |   |   |   |   |   |   |   |   |   |   |   |   |
|-------------|--------------------------------------------------------------------------------------------------------------------------------------------------------------|--------------|-----|---------|---------|---|---|---|---|---|---|---|---|---|---|---|---|---|---|---|---|
| Pen_Vic_78  | <i>Poa ensiformis</i>                                                                                                                                        | MEL 2023602A | Vic | -37.500 | 145.867 | 1 | 1 | 1 | 0 | 1 | 0 | 0 |   |   |   |   |   |   |   |   |   |
| Pfa_ACT_16  | <i>Poa fawcettiae</i>                                                                                                                                        | MEL 2138088A | ACT | -35.567 | 148.767 | 1 | 1 | 1 | 1 | 1 | 1 | 1 | 0 | 0 |   |   |   |   |   |   |   |
| Pfa_ACT_9   | <i>Poa fawcettiae</i>                                                                                                                                        | MEL 596118A  | ACT | -37.817 | 146.294 | 1 | 1 | 1 | 1 | 1 | 0 | 0 |   |   |   |   |   |   |   |   |   |
| Pfa_NSW_11  | <i>Poa fawcettiae</i>                                                                                                                                        | MEL 1518741A | NSW | -37.350 | 146.783 | 1 | 0 | 1 | 1 | 1 | 0 | 0 |   |   |   |   |   |   |   |   |   |
| Pfa_NSW_131 | <i>Poa fawcettiae</i>                                                                                                                                        | CANB 505356  | NSW | -36.450 | 148.250 |   |   |   |   |   | 1 | 1 | 1 | 1 | 1 | 1 | 0 | 0 | 1 | 1 | 1 |
| Pfa_NSW_132 | <i>Poa fawcettiae</i>                                                                                                                                        | CANB 505353  | NSW | -36.450 | 148.283 |   |   |   |   |   | 1 | 1 | 1 | 1 | 1 | 0 | 1 | 1 | 1 | 1 | 1 |
| Pfa_NSW_133 | <i>Poa fawcettiae</i>                                                                                                                                        | CANB 505340  | NSW | -36.450 | 148.283 |   |   |   |   |   | 1 | 1 | 1 | 1 | 1 | 1 | 0 | 0 | 1 | 1 | 1 |
| Pfa_NSW_134 | <i>Poa fawcettiae</i>                                                                                                                                        | CANB 228865  | NSW | -36.350 | 148.417 |   |   |   |   |   | 1 | 1 | 1 | 1 | 1 | 1 | 0 | 0 | 1 | 1 | 1 |
| Pfa_NSW_135 | <i>Poa fawcettiae</i>                                                                                                                                        | CANB 345640  | NSW | -36.400 | 148.350 |   |   |   |   |   | 1 | 1 | 1 | 1 | 1 | 1 | 1 | 1 | 1 | 1 | 1 |
| Pfa_NSW_136 | <i>Poa fawcettiae</i>                                                                                                                                        | CANB 228879  | NSW | -36.417 | 148.417 |   |   |   |   |   | 1 | 1 | 1 | 1 | 1 | 0 | 1 | 1 | 1 | 1 | 1 |
| Pfa_NSW_137 | <i>Poa fawcettiae</i>                                                                                                                                        | CANB 230925  | NSW | -36.450 | 148.283 |   |   |   |   |   | 1 | 1 | 1 | 1 | 1 | 1 | 1 | 1 | 1 | 1 | 1 |
| Pfa_NSW_15  | <i>Poa fawcettiae</i>                                                                                                                                        | MEL 649620A  | NSW | -36.450 | 148.267 | 1 | 1 | 1 | 1 | 1 | 1 | 1 | 0 | 0 |   |   |   |   |   |   |   |
| Pfa_NSW_17  | <i>Poa fawcettiae</i>                                                                                                                                        | MEL 652850A  | NSW | -36.350 | 148.417 | 1 | 1 | 1 | 1 | 1 | 0 | 0 | 0 | 0 |   |   |   |   |   |   |   |
| Pfa_NSW_18  | <i>Poa fawcettiae</i>                                                                                                                                        | MEL 286299A  | NSW | -36.450 | 148.250 | 0 | 0 | 1 | 1 | 0 | 0 | 0 |   |   |   |   |   |   |   |   |   |
| Pfa_Tas_13  | <i>Poa fawcettiae</i>                                                                                                                                        | MEL 695201A  | Tas | -41.533 | 147.650 | 1 | 1 | 1 | 1 | 1 | 1 | 1 | 1 | 1 |   |   |   |   |   |   |   |
| Pfa_Tas_14  | <i>Poa fawcettiae</i>                                                                                                                                        | MEL 2138673A | Tas | -41.750 | 147.500 | 1 | 1 | 1 | 1 | 1 | 1 | 1 | 0 | 0 |   |   |   |   |   |   |   |
| Pfa_Vic_10  | <i>Poa fawcettiae</i>                                                                                                                                        | MEL 619714A  | Vic | -37.840 | 146.274 | 1 | 1 | 1 | 1 | 1 | 1 | 1 | 0 | 1 |   |   |   |   |   |   |   |
| Pfa_Vic_12  | <i>Poa fawcettiae</i>                                                                                                                                        | MEL 2013073A | Vic | -37.125 | 147.117 | 1 | 1 | 1 | 1 | 1 | 0 | 0 | 0 | 0 |   |   |   |   |   |   |   |
| Pfa_Vic_146 | <i>Poa fawcettiae</i>                                                                                                                                        | CANB 488116  | Vic | -37.160 | 146.427 |   |   |   |   |   | 1 | 1 | 1 | 1 | 1 | 0 | 1 | 1 | 1 | 1 | 1 |
| Pfa_Vic_147 | <i>Poa fawcettiae</i>                                                                                                                                        | CANB 67067   | Vic | -37.317 | 142.333 |   |   |   |   |   | 1 | 1 | 1 | 1 | 1 | 0 | 1 | 1 | 1 | 1 | 1 |
| Pfa_Vic_148 | <i>Poa fawcettiae</i>                                                                                                                                        | CANB 9501151 | Vic | -36.892 | 147.138 |   |   |   |   |   | 1 | 1 | 1 | 1 | 1 | 1 | 1 | 1 | 1 | 1 | 1 |
| Pfa_Vic_43  | <i>Poa fawcettiae</i>                                                                                                                                        | MELU M10771  | Vic | -37.504 | 145.883 | 1 | 1 | 1 | 1 | 1 | 0 | 0 |   |   |   |   |   |   |   |   |   |
| Pfa_Vic_f1  | <i>Poa fawcettiae</i><br>field collection 2005, Mt Nelse,<br>Bogong High Plains, Alpine National<br>Park. Alpine grassland. Coll: S. Byars.<br>Det: N. Walsh |              | Vic | -36.825 | 147.342 |   |   |   |   |   | 1 | 0 | 1 | 1 |   |   |   |   |   |   |   |
| Pgu_Tas_149 | <i>Poa gunnii</i>                                                                                                                                            | CANB 8904303 | Tas | -42.678 | 146.503 |   |   |   |   |   | 1 | 1 | 1 | 1 | 1 | 0 | 1 | 1 | 1 | 0 | 1 |
| Pgu_Tas_150 | <i>Poa gunnii</i>                                                                                                                                            | CANB 195943  | Tas | -42.650 | 146.517 |   |   |   |   |   | 1 | 1 | 1 | 1 | 1 | 0 | 1 | 1 | 1 | 1 | 1 |
| Pgu_Tas_151 | <i>Poa gunnii</i>                                                                                                                                            | CANB 341316  | Tas | -41.533 | 147.667 |   |   |   |   |   | 0 | 1 | 0 | 0 | 1 | 0 | 1 | 1 | 1 | 0 | 1 |
| Pgu_Tas_152 | <i>Poa gunnii</i>                                                                                                                                            | CANB 402406  | Tas | -42.950 | 146.400 |   |   |   |   |   | 1 | 1 | 1 | 0 | 1 | 0 | 1 | 1 | 1 | 0 | 1 |
| Pgu_Tas_153 | <i>Poa gunnii</i>                                                                                                                                            | CANB 9215410 | Tas | -41.508 | 147.667 |   |   |   |   |   | 1 | 1 | 1 | 0 | 1 | 0 | 0 | 1 | 1 | 0 | 1 |



|             |                                                                                                                                                           |              |     |         |         |   |   |   |   |   |   |   |   |   |   |   |   |   |   |   |
|-------------|-----------------------------------------------------------------------------------------------------------------------------------------------------------|--------------|-----|---------|---------|---|---|---|---|---|---|---|---|---|---|---|---|---|---|---|
| Phi_Vic_f2  | <i>Poa hiemata</i><br>field collection 2005, Mt Nelse,<br>Bogong High Plains, Alpine National<br>Park. Alpine grassland. Coll: S. Byars.<br>Det: N. Walsh |              | Vic | -36.825 | 147.342 |   |   |   |   |   | 0 | 1 | 1 | 1 |   |   |   |   | 1 | 1 |
| Phi_Vic_f3  | <i>Poa hiemata</i><br>field collection 2005, Mt Nelse,<br>Bogong High Plains, Alpine National<br>Park. Alpine grassland. Coll: S. Byars.<br>Det: N. Walsh |              | Vic | -36.825 | 147.342 | 1 | 1 | 1 | 1 | 1 | 0 | 0 |   |   |   |   |   |   |   |   |
| Pho_Vic_191 | <i>Poa hothamensis</i><br><i>var. hothamensis</i>                                                                                                         | CANB 409990  | Vic | -36.867 | 147.267 |   |   |   |   |   | 1 | 1 | 1 | 1 | 1 | 0 | 1 | 1 | 1 | 1 |
| Pho_Vic_192 | <i>Poa hothamensis</i><br><i>var. hothamensis</i>                                                                                                         | CANB 67341   | Vic | -36.983 | 147.150 |   |   |   |   |   | 1 | 1 | 1 | 1 | 1 | 0 | 1 | 1 | 1 | 1 |
| Pho_Vic_198 | <i>Poa hothamensis</i><br><i>var. hothamensis</i>                                                                                                         | CANB 207886  | Vic | -36.933 | 147.283 |   |   |   |   |   | 1 | 1 | 1 | 0 | 1 | 0 | 1 | 1 | 1 | 1 |
| Pho_Vic_199 | <i>Poa hothamensis</i><br><i>var. hothamensis</i>                                                                                                         | CANB 207893  | Vic | -37.833 | 146.283 |   |   |   |   |   | 1 | 1 | 0 | 0 | 1 | 0 | 0 | 1 | 1 | 0 |
| Pho_Vic_41  | <i>Poa hothamensis</i><br><i>var. hothamensis</i>                                                                                                         | MELU M102595 | Vic | -36.893 | 147.214 | 1 | 1 | 1 | 1 | 1 | 0 | 0 | 0 | 0 |   |   |   |   | 0 | 1 |
| Pho_Vic_42  | <i>Poa hothamensis</i><br><i>var. hothamensis</i>                                                                                                         | MELU M102597 | Vic | -36.875 | 147.249 | 0 | 0 | 1 | 0 | 1 | 0 | 0 |   |   |   |   |   |   |   |   |
| Pho_Vic_65  | <i>Poa hothamensis</i><br><i>var. hothamensis</i>                                                                                                         | MEL 1592155A | Vic | -36.867 | 147.267 | 1 | 0 | 1 | 1 | 1 | 0 | 0 |   |   |   |   |   |   |   |   |
| Pho_Vic_67  | <i>Poa hothamensis</i><br><i>var. hothamensis</i>                                                                                                         | MEL 252256A  | Vic | -36.883 | 147.317 | 1 | 1 | 1 | 1 | 1 | 1 | 0 | 1 | 1 |   |   |   |   | 0 | 0 |
| Pho_Vic_68  | <i>Poa hothamensis</i><br><i>var. hothamensis</i>                                                                                                         | MEL 1592158A | Vic | -36.750 | 146.783 | 0 | 1 | 1 | 1 | 1 | 0 | 0 |   |   |   |   |   |   |   |   |
| Pho_Vic_69  | <i>Poa hothamensis</i><br><i>var. hothamensis</i>                                                                                                         | MEL 1542253A | Vic | -36.746 | 147.537 | 1 | 1 | 1 | 1 | 0 | 0 | 0 |   |   |   |   |   |   |   |   |
| Pho_Vic_70  | <i>Poa hothamensis</i><br><i>var. hothamensis</i>                                                                                                         | MEL 2275845A | Vic | -36.958 | 147.333 | 1 | 0 | 1 | 0 | 0 | 0 | 0 |   |   |   |   |   |   |   |   |
| Pho_Vic_71  | <i>Poa hothamensis</i><br><i>var. hothamensis</i>                                                                                                         | MEL 717823A  | Vic | -37.000 | 147.150 | 1 | 0 | 1 | 1 | 1 | 0 | 0 |   |   |   |   |   |   |   |   |
| Pho_Vic_89  | <i>Poa hothamensis</i><br><i>var. hothamensis</i>                                                                                                         | CANB 207890  | Vic | -36.933 | 147.283 |   |   |   |   |   | 1 | 1 | 1 | 1 | 1 | 0 | 1 | 1 | 1 | 1 |
| Pho_Vic_f1  | <i>Poa hothamensis</i><br><i>var. hothamensis</i><br>field collection 2005, Mt Nelse,<br>Bogong High Plains, Alpine National                              |              | Vic | -36.825 | 147.342 |   |   |   |   |   | 1 | 1 | 1 | 1 |   |   |   |   |   | 1 |



|            |                        |              |     |         |         |    |    |    |    |    |    |    |    |    |    |    |    |    |    |    |     |
|------------|------------------------|--------------|-----|---------|---------|----|----|----|----|----|----|----|----|----|----|----|----|----|----|----|-----|
|            | <i>var. sieberiana</i> |              |     |         |         |    |    |    |    |    |    |    |    |    |    |    |    |    |    |    |     |
|            | <i>Poa sieberiana</i>  |              |     |         |         |    |    |    |    |    |    |    |    |    |    |    |    |    |    |    |     |
| Psi_Vic_29 | <i>var. sieberiana</i> | MEL 1056947A | Vic | -37.217 | 145.900 | 1  | 1  | 1  | 1  | 1  | 0  | 0  | 0  | 0  |    |    |    |    | 0  | 1  |     |
| Psi_Vic_30 | <i>Poa sieberiana</i>  |              |     |         |         |    |    |    |    |    |    |    |    |    |    |    |    |    |    |    |     |
| Psi_Vic_30 | <i>var. sieberiana</i> | MEL 519545A  | Vic | -37.167 | 146.617 | 1  | 0  | 1  | 1  | 1  | 0  | 0  |    |    |    |    |    |    |    |    |     |
| Psi_Vic_31 | <i>Poa sieberiana</i>  |              |     |         |         |    |    |    |    |    |    |    |    |    |    |    |    |    |    |    |     |
| Psi_Vic_31 | <i>var. sieberiana</i> | MEL 2268838A | Vic | -37.053 | 148.084 | 1  | 1  | 1  | 1  | 1  | 1  | 0  | 1  | 1  |    |    |    |    | 1  | 1  |     |
| Psi_Vic_32 | <i>Poa sieberiana</i>  |              |     |         |         |    |    |    |    |    |    |    |    |    |    |    |    |    |    |    |     |
| Psi_Vic_32 | <i>var. sieberiana</i> | MEL 2269869A | Vic | -35.848 | 143.572 | 1  | 1  | 1  | 1  | 1  | 1  | 1  | 1  | 1  |    |    |    |    | 1  | 1  |     |
| Psi_Vic_35 | <i>Poa sieberiana</i>  |              |     |         |         |    |    |    |    |    |    |    |    |    |    |    |    |    |    |    |     |
| Psi_Vic_35 | <i>var. sieberiana</i> | MEL 1537323A | Vic | -37.353 | 149.938 | 1  | 0  | 1  | 1  | 0  | 0  | 0  |    |    |    |    |    |    |    |    |     |
| TOTAL      |                        |              |     |         |         | 65 | 53 | 69 | 63 | 60 | 82 | 78 | 78 | 73 | 57 | 16 | 52 | 53 | 56 | 60 | 102 |

**TABLE S2.** PCR annealing temperature, size range and total number of alleles detected across the 10 species surveyed for each microsatellite marker.

| Marker | Primers from             | Annealing temp. (°C) | Size (bp) | Plants genotyped | Total no. alleles | Alleles found by Byars <i>et al.</i> (2009) | H <sub>o</sub> |
|--------|--------------------------|----------------------|-----------|------------------|-------------------|---------------------------------------------|----------------|
| AE5    | (Albertini et al., 2003) | 48                   | 239–305   | 53               | 21                | 6                                           | 0.94           |
| CA1D4  | (Maurer et al., 2005)    | 57.5                 | 294–336   | 65               | 21                | 13                                          | 0.74           |
| MI6-B  | (Kindiger, 2006)         | 56                   | 127–182   | 60               | 24                | 14                                          | 0.73           |
| H01H06 | (Kindiger, 2006)         | 59.5                 | 166–182   | 69               | 13                | 10                                          | 0.83           |
| CA1F4  | (Maurer et al., 2005)    | 60                   | 171–229   | 64               | 22                | 35                                          | 0.70           |
| GAC1   | (Maurer et al., 2005)    | 57                   | 79–106    | Marker excluded  | 19 (unreliable)   | 17                                          | ---            |

H<sub>o</sub> = observed heterozygosity (proportion of heterozygotes).

**TABLE S3.** Chloroplast and nuclear regions: PCR annealing temperature, size range and total number of alleles detected. The primers and conditions reported here are those used for the initial Sanger sequencing (for the chloroplast regions, and the nuclear regions *waxy* and *DMC1*); and those used for the 454 sequencing that were not reported in Griffin et al. (2011): *trx* and *CDO504*.

| Region            | Sequencing method | Primers from                                     | PCR conditions                                                                                                | No. individuals sequenced | Gene Copy | Length (bp) | Base changes      | Indels            |
|-------------------|-------------------|--------------------------------------------------|---------------------------------------------------------------------------------------------------------------|---------------------------|-----------|-------------|-------------------|-------------------|
| <i>rpl32-trnL</i> | Sanger            | (Shaw et al., 2007)                              | 80°C (5 min); 30 × 95°C (60 s),<br>54°C (60 s), 65°C (4 min); 65°C<br>(5 min)                                 | 40                        |           | 838–850     | 2                 | 3 (2–8 bp)        |
| <i>rpoB-trnC</i>  | Sanger            | (Shaw et al., 2005)                              | 80°C (5 min); 35 × 96°C (60 s),<br>52°C (30 s), 72°C (30 s); 72°C<br>(5 min)                                  | 13                        |           | 1176–1177   | 3                 | 2 (1 bp)          |
| <i>trnH-psbA</i>  | Sanger            | (Tate and Simpson, 2003),<br>(Sang et al., 1997) | 95°C (5 min); 35 × 95°C (45 s),<br>56°C (60 s), 72°C (30 s); 72°C<br>(3 min)                                  | 0                         |           | Approx. 800 | Poor<br>sequence* | Poor<br>sequence* |
| <i>DMC1</i>       | Sanger            | (Petersen and Seberg, 2000)                      | 95°C (2 min); 40 × 95°C (60 s),<br>55°C (60 s), 72°C (2 min); 72°C<br>(10 min). [MgCl <sub>2</sub> ] = 2.5 mM | 19                        | Copy A    | 1047        | 17                | 0                 |
|                   |                   |                                                  |                                                                                                               | 17                        | Copy B    | 1017        | 29                | 0                 |
| <i>waxy</i>       | Sanger            | (Petersen and Seberg, 2000)                      | 94°C (2 min); 35 × 94°C (60 s),<br>65°C (60 s), 72°C (2 min); 72°C<br>(10 min). [MgCl <sub>2</sub> ] = 2.0 mM | 26                        | Copy A    | 511–519     | 41                | 1 (8 bp)          |
|                   |                   |                                                  |                                                                                                               | 20                        | Copy B    | 519–535     | 22                | 5 (1–14<br>bp)    |
| <i>trx</i>        | 454               | (for) 5'-<br>TGATGTTGATGACCTGA                   | 96°C (2 min); 40 × 96°C (40 s),<br>50°C (60 s), 72°C (40 s); 72°C                                             | 57                        | Copy A    | 338-381     | 113               | 8 (1-12 bp)       |



|             |     |                   |                                        |    |  |          |         |    |             |
|-------------|-----|-------------------|----------------------------------------|----|--|----------|---------|----|-------------|
|             |     | TGGT-3'           | (5 min). [MgCl <sub>2</sub> ] = 2.0 mM |    |  |          |         |    |             |
|             |     | (rev) 5'-         |                                        | 18 |  | Copy B** | 387-393 | 29 | 0           |
|             |     | AGCACACTCCACACAG  |                                        |    |  |          |         |    |             |
|             |     | TTTCA-3'          |                                        |    |  |          |         |    |             |
| <b>waxy</b> | 454 | (for) 5'-         | 96°C (2 min); 40 × 96°C (40 s),        | 56 |  | Copy A   | 362-412 | 75 | 7 (2-13 bp) |
|             |     | ATTGCCGTCAACTACGA | 50°C (60 s), 72°C (40 s); 72°C         |    |  |          |         |    |             |
|             |     | TGC-3'            | (5 min). [MgCl <sub>2</sub> ] = 2.0 mM |    |  |          |         |    |             |
|             |     | (rev) 5'-         |                                        | 58 |  | Copy B   | 379-408 | 87 | 5 (2-13 bp) |
|             |     | GGCCATGATCTGGTGA  |                                        |    |  |          |         |    |             |
|             |     | GC-3'             |                                        |    |  |          |         |    |             |

For the multiple-gene analysis described in the text, the Sanger-sequenced results were aligned with the consensus 454 results and trimmed to match their shorter length. The final alignment was used to create input for \*BEAST.

The *trx* Copy A dataset included two *Poa annua* sequences from GenBank (accession numbers 51702653 and 51702654).

*Trx* Copy A and *waxy* Copy A and B 454 results include *Poa annua* sequences, hence the higher number of SNPs and indels.

\* These primers produced poor products for *trnH-psbA* but the primers used for later sequencing (Griffin et al., 2011) produced shorter, clean products

\*\* *trx* Copy B amplified poorly in most individuals and was excluded from further analysis

## References

- Albertini E, Porceddu A, Marconi G, Barcacia G, Pallottini L, Falcinelli M. 2003. Microsatellite-AFLP for genetic mapping of complex polyploids. *Genome*, **46**: 824-832.
- Griffin P, Robin C, Hoffmann A. 2011. A next-generation sequencing method for overcoming the multiple gene copy problem in polyploid phylogenetics, applied to *Poa* grasses. *BMC Biology*, **9**: 19.
- Kindiger B. 2006. Cross-species amplification of *Lolium* microsatellites in *Poa* ssp. *Grassland Science*, **52**: 105-115.

- Maurer K, Gautschi B, Weyand A, Stöcklin J, Fischer M. 2005.** Isolation and characterization of microsatellite DNA markers in the grass *Poa alpina* L. *Molecular Ecology Notes*, **5**: 719-720.
- Petersen G, Seberg O. 2000.** Phylogenetic evidence for excision of *Stowaway* Miniature Inverted-Repeat Transposable Elements in Triticeae (Poaceae). *Molecular Biology and Evolution*, **17**: 1589-1596.
- Sang T, Crawford D, Stuessy T. 1997.** Chloroplast DNA phylogeny, reticulate evolution, and biogeography of *Paeonia* (Paeoniaceae). *American Journal of Botany*, **84**: 1120-1136.
- Shaw J, Lickey E, Beck J, Farmer S, Liu W, Miller J, Siripun K, Winder C, Schilling E, Small R. 2005.** The tortoise and the hare II: relative utility of 21 noncoding chloroplast DNA sequences for phylogenetic analysis. *American Journal of Botany*, **92**: 142-166.
- Shaw J, Lickey E, Schilling E, Small R. 2007.** Comparison of whole chloroplast genome sequences to choose noncoding regions for phylogenetic studies in angiosperms: the tortoise and the hare III. *American Journal of Botany*, **94**: 275-288.
- Tate J, Simpson B. 2003.** Paraphyly of *Tarasa* (Malvaceae) and diverse origins of the polyploid species. *Systematic Botany*, **28**: 723-737.
